# Supplementary material for: Single-cell antigen-specific landscape of CAR T infusion product identifies determinants of CD19-positive relapse in patients with ALL
Source: PubMed Central journal article supplement — Sci Adv. 2022 Jun 8;8(23):eabj2820. doi: 10.1126/sciadv.abj2820 (PMC9177075; doi:10.1126/sciadv.abj2820), 2022-06-08
Supplement: sciadv.abj2820_sm.pdf [file sciadv.abj2820_sm.pdf]

Supplementary Materials for  
**Single-cell antigen-specific landscape of CAR T infusion product identifies  
determinants of CD19-positive relapse in patients with ALL**

Zhiliang Bai *et al.*

Corresponding author: Rong Fan, [rong.fan@yale.edu](mailto:rong.fan@yale.edu); Pablo G. Camara, [pcamara@pennmedicine.upenn.edu](mailto:pcamara@pennmedicine.upenn.edu);  
J. Joseph Melenhorst, [melenhj@ccf.org](mailto:melenhj@ccf.org)

*Sci. Adv.* **8**, eabj2820 (2022)  
DOI: 10.1126/sciadv.abj2820

**The PDF file includes:**

Tables S1 to S3  
Figs. S1 to S19

**Other Supplementary Material for this manuscript includes the following:**

Table S2

**Supplementary Table 1.** Patient demographics and response documentation of discovery cohort

| ID     | Infusion date | Age  | Sex | Response to CART19 | B cell aplasia (BCA) | Relapse | Time to relapse (days) | Relapse type  | Last contact days |
|--------|---------------|------|-----|--------------------|----------------------|---------|------------------------|---------------|-------------------|
| CHP112 | 4/16/13       | 9.6  | F   | MRD neg CR         | Yes                  | No      | N/A                    | N/A           | 2171              |
| CHP139 | 6/11/14       | 15.2 | F   | MRD neg CR         | Yes                  | Yes     | 1807                   | CD19 negative | 2000              |
| CHP151 | 9/9/14        | 15.5 | F   | MRD neg CR         | Yes                  | No      | N/A                    | N/A           | 1833              |
| CHP158 | 2/25/15       | 4.9  | F   | MRD neg CR         | Yes                  | No      | N/A                    | N/A           | 1696              |
| CHP165 | 6/23/15       | 14.5 | M   | MRD neg CR         | Yes                  | No      | N/A                    | N/A           | 1637              |
| CHP157 | 2/10/15       | 12.3 | M   | MRD neg CR         | Yes                  | Yes     | 632                    | CD19 positive | 1135              |
| CHP161 | 4/7/15        | 9.7  | F   | MRD neg CR         | Yes                  | Yes     | 287                    | CD19 positive | 602               |
| CHP171 | 9/8/15        | 9.8  | M   | MRD neg CR         | Yes                  | Yes     | 595                    | CD19 positive | 944               |
| CHP110 | 3/19/13       | 10.0 | F   | MRD neg CR         | Yes                  | Yes     | 79                     | CD19 positive | 221               |
| CHP111 | 4/1/13        | 9.9  | F   | MRD positive       | Yes                  | Yes     | 44                     | CD19 positive | 69                |
| CHP117 | 5/9/13        | 16.2 | M   | No response        | N/A                  | N/A     | N/A                    | N/A           | 79                |
| CHP167 | 7/9/15        | 21.5 | M   | No response        | N/A                  | N/A     | N/A                    | N/A           | 31                |

**Supplementary Table 2.** Differentially expressed genes between proliferating, partially active, and fully active cell populations across the 4 experimental conditions. **Attached as separate files.**

**Supplementary Table 3.** Patient demographics and response documentation of validation cohort

| ID         | Infusion date | Age  | Response to CART19 | B cell aplasia (BCA) | Relapse | Time to relapse (days) | Relapse type  | Last contact days |
|------------|---------------|------|--------------------|----------------------|---------|------------------------|---------------|-------------------|
| CHP959-112 | 4/16/13       | 9.6  | MRD neg CR         | Yes                  | No      | N/A                    | N/A           | 2171              |
| CHP959-115 | 5/21/13       | 15.0 | MRD neg CR         | Yes                  | No      | N/A                    | N/A           | 2395              |
| CHP959-118 | 7/16/13       | 9.3  | MRD neg CR         | Yes                  | No      | N/A                    | N/A           | 2134              |
| CHP959-145 | 7/22/14       | 11.1 | MRD neg CR         | Yes                  | No      | N/A                    | N/A           | 1828              |
| CHP959-154 | 2/17/15       | 16.2 | MRD neg CR         | Yes                  | No      | N/A                    | N/A           | 1764              |
| CHP959-158 | 2/25/15       | 4.9  | MRD neg CR         | Yes                  | No      | N/A                    | N/A           | 1696              |
| CHP959-165 | 6/23/15       | 14.5 | MRD neg CR         | Yes                  | No      | N/A                    | N/A           | 1637              |
| 16CT022-02 | 10/18/16      | 13.7 | MRD neg CR         | Yes                  | No      | N/A                    | N/A           | 1098              |
| 16CT022-04 | 11/15/16      | 20.4 | MRD neg CR         | Yes                  | No      | N/A                    | N/A           | 1072              |
| 16CT022-06 | 11/22/16      | 6.0  | MRD neg CR         | Yes                  | No      | N/A                    | N/A           | 1105              |
| 16CT022-08 | 12/13/16      | 20.3 | MRD neg CR         | Yes                  | No      | N/A                    | N/A           | 906               |
| 16CT022-09 | 12/20/16      | 8.5  | MRD neg CR         | Yes                  | No      | N/A                    | N/A           | 902               |
| 16CT022-10 | 12/6/16       | 17.5 | MRD neg CR         | Yes                  | No      | N/A                    | N/A           | 1029              |
| 16CT022-11 | 12/6/16       | 22.3 | MRD neg CR         | Yes                  | No      | N/A                    | N/A           | 1094              |
| 16CT022-12 | 1/3/17        | 11.3 | MRD neg CR         | Yes                  | No      | N/A                    | N/A           | 910               |
| 16CT022-13 | 12/27/16      | 12.6 | MRD neg CR         | Yes                  | No      | N/A                    | N/A           | 994               |
| 16CT022-14 | 12/27/16      | 10.1 | MRD neg CR         | Yes                  | No      | N/A                    | N/A           | 1091              |
| 16CT022-20 | 1/24/17       | 29.1 | MRD neg CR         | Yes                  | No      | N/A                    | N/A           | 913               |
| 16CT022-27 | 4/11/17       | 13.3 | MRD neg CR         | Yes                  | No      | N/A                    | N/A           | 932               |
| 16CT022-30 | 4/18/17       | 11.1 | MRD neg CR         | Yes                  | No      | N/A                    | N/A           | 916               |
| 16CT022-32 | 3/28/17       | 19.1 | MRD neg CR         | Yes                  | No      | N/A                    | N/A           | 986               |
| 16CT022-36 | 6/6/17        | 3.7  | MRD neg CR         | Yes                  | No      | N/A                    | N/A           | 916               |
| 16CT022-38 | 6/27/17       | 8.7  | MRD neg CR         | Yes                  | No      | N/A                    | N/A           | 741               |
| 16CT022-39 | 7/25/17       | 2.8  | MRD neg CR         | Yes                  | No      | N/A                    | N/A           | 737               |
| 16CT022-40 | 7/18/17       | 14.8 | MRD neg CR         | Yes                  | No      | N/A                    | N/A           | 755               |
| 16CT022-41 | 8/1/17        | 13.3 | MRD neg CR         | Yes                  | No      | N/A                    | N/A           | 724               |
| CHP959-104 | 1/8/13        | 6.1  | MRD neg CR         | Yes                  | Yes     | 184                    | CD19 positive | 1148              |
| CHP959-105 | 1/29/13       | 7.8  | MRD neg CR         | Yes                  | Yes     | 244                    | CD19 positive | 952               |
| CHP959-110 | 3/19/13       | 10.0 | MRD neg CR         | Yes                  | Yes     | 79                     | CD19 positive | 221               |
| CHP959-111 | 4/1/13        | 9.9  | MRD neg CR         | Yes                  | Yes     | 44                     | CD19 positive | 69                |
| CHP959-124 | 9/17/13       | 9.2  | MRD neg CR         | Yes                  | Yes     | 185                    | CD19 positive | 617               |

|            |          |      |            |     |     |      |               |      |
|------------|----------|------|------------|-----|-----|------|---------------|------|
| CHP959-144 | 8/5/14   | 15.2 | MRD neg CR | Yes | Yes | 289  | CD19 positive | 1928 |
| CHP959-150 | 9/30/14  | 17.3 | MRD neg CR | Yes | Yes | 272  | CD19 positive | 1855 |
| CHP959-152 | 10/28/14 | 9.9  | MRD neg CR | Yes | Yes | 1367 | CD19 positive | 1581 |
| CHP959-153 | 12/2/14  | 15.8 | MRD neg CR | Yes | Yes | 510  | CD19 positive | 534  |
| CHP959-157 | 2/10/15  | 12.3 | MRD neg CR | Yes | Yes | 632  | CD19 positive | 1135 |
| CHP959-161 | 4/7/15   | 9.7  | MRD neg CR | Yes | Yes | 287  | CD19 positive | 602  |
| CHP959-163 | 5/5/15   | 13.3 | MRD neg CR | Yes | Yes | 757  | CD19 positive | 892  |
| CHP959-169 | 7/28/15  | 1.7  | MRD neg CR | Yes | Yes | 104  | CD19 positive | 859  |
| CHP959-171 | 9/8/15   | 9.8  | MRD neg CR | Yes | Yes | 595  | CD19 positive | 944  |
| CHP959-172 | 9/22/15  | 13.3 | MRD neg CR | Yes | Yes | 518  | CD19 positive | 1456 |
| 16CT022-18 | 1/10/17  | 15.3 | MRD neg CR | Yes | Yes | 230  | CD19 positive | 505  |
| 16CT022-29 | 3/14/17  | 8.3  | MRD neg CR | Yes | Yes | 372  | CD19 positive | 980  |
| 16CT022-37 | 6/6/17   | 13.7 | MRD neg CR | Yes | Yes | 156  | CD19 positive | 176  |
| 16CT022-51 | 10/3/17  | 12.4 | MRD neg CR | Yes | Yes | 279  | CD19 positive | 723  |
| 16CT022-52 | 10/10/17 | 23.0 | MRD neg CR | Yes | Yes | 668  | CD19 positive | 783  |
| 16CT022-55 | 9/26/17  | 5.0  | MRD neg CR | Yes | Yes | 428  | CD19 positive | 769  |
| 16CT022-69 | 2/13/18  | 6.5  | MRD neg CR | Yes | Yes | 146  | CD19 positive | 216  |
| 16CT022-77 | 2/5/19   | 11.7 | MRD neg CR | Yes | Yes | 272  | CD19 positive | 319  |

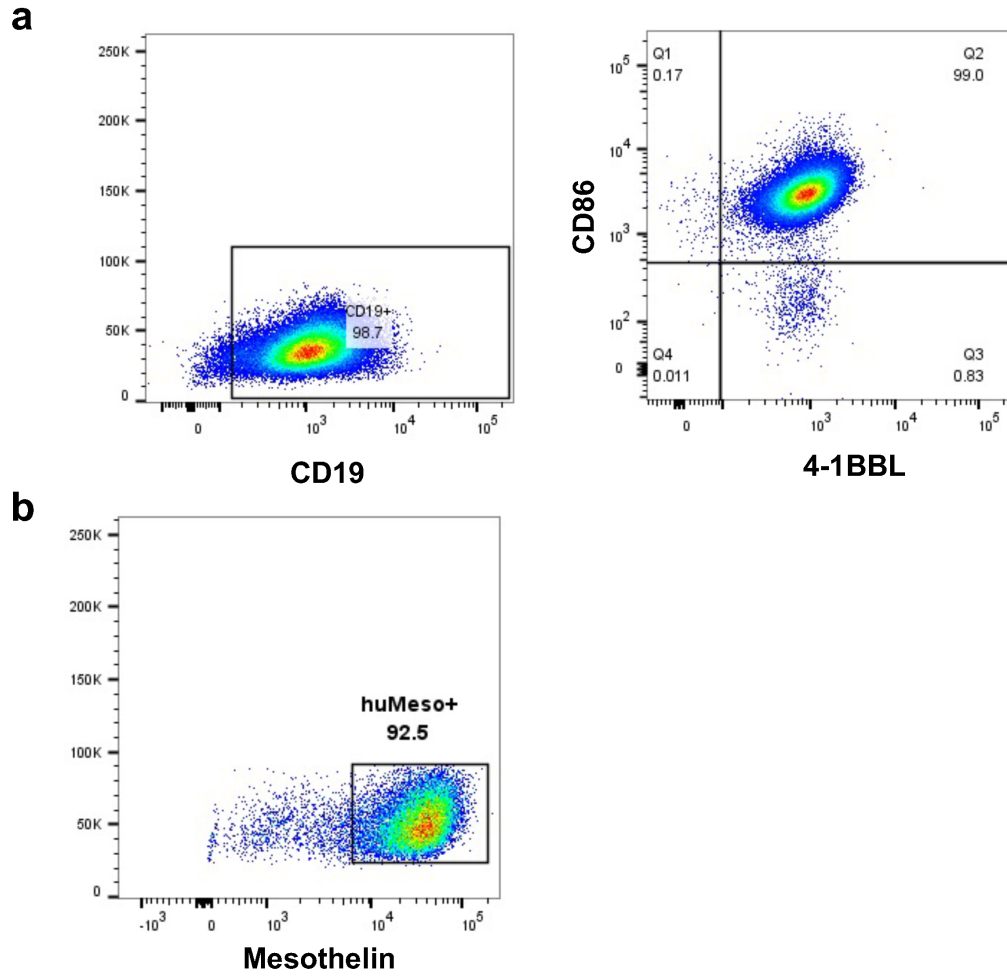

**Supplementary Figure 1. Flow cytometry evaluation of engineered 3T3 cells. (a, b)** Representative flow cytometry plots showing stable expression of human CD19, CD86, 4-1BB ligand **(a)** and mesothelin **(b)** in 3T3 cells.

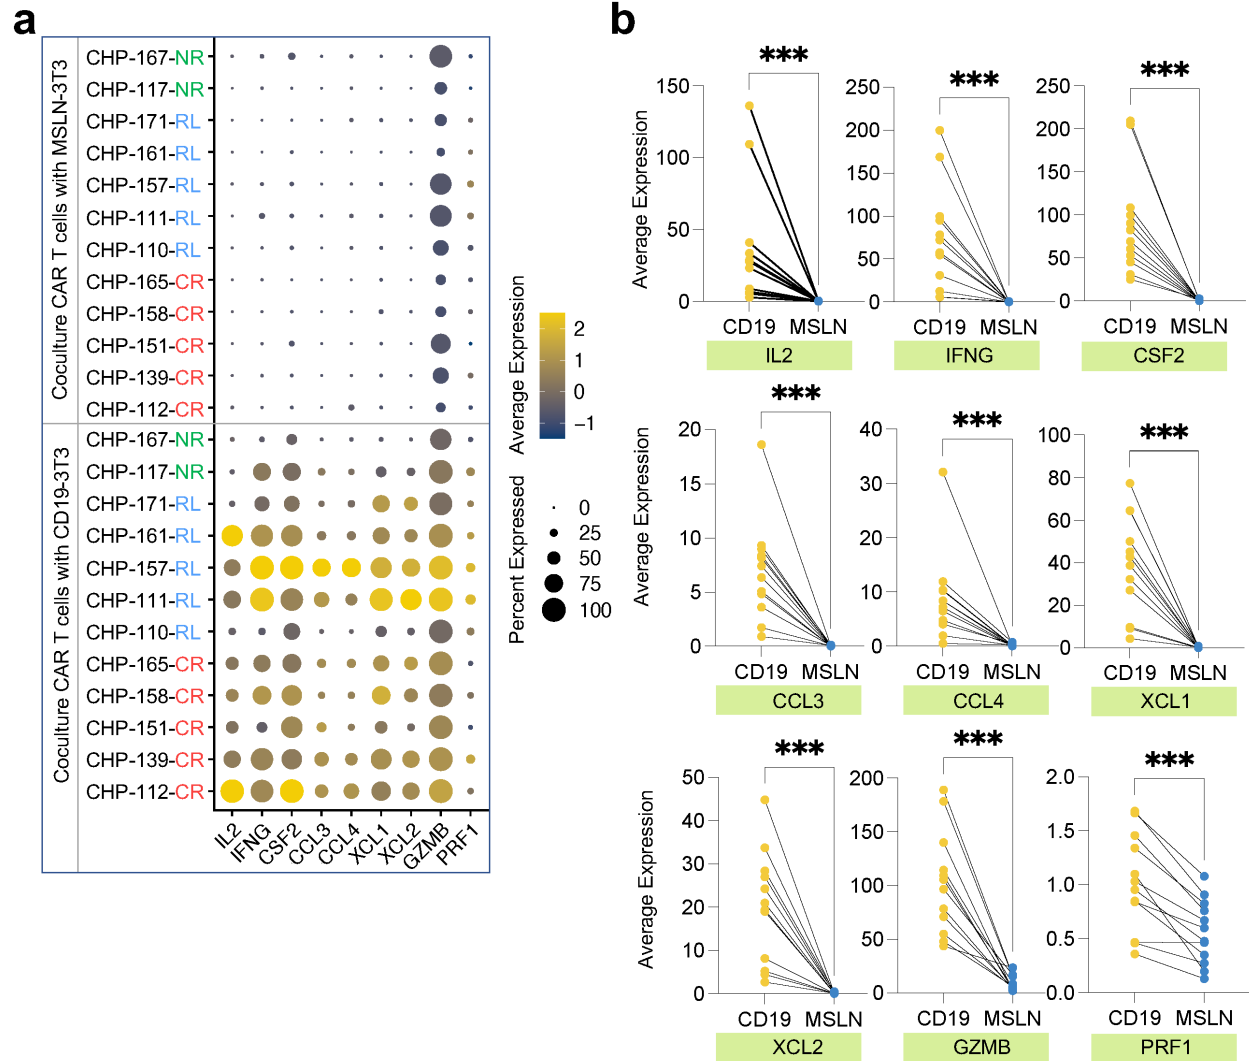

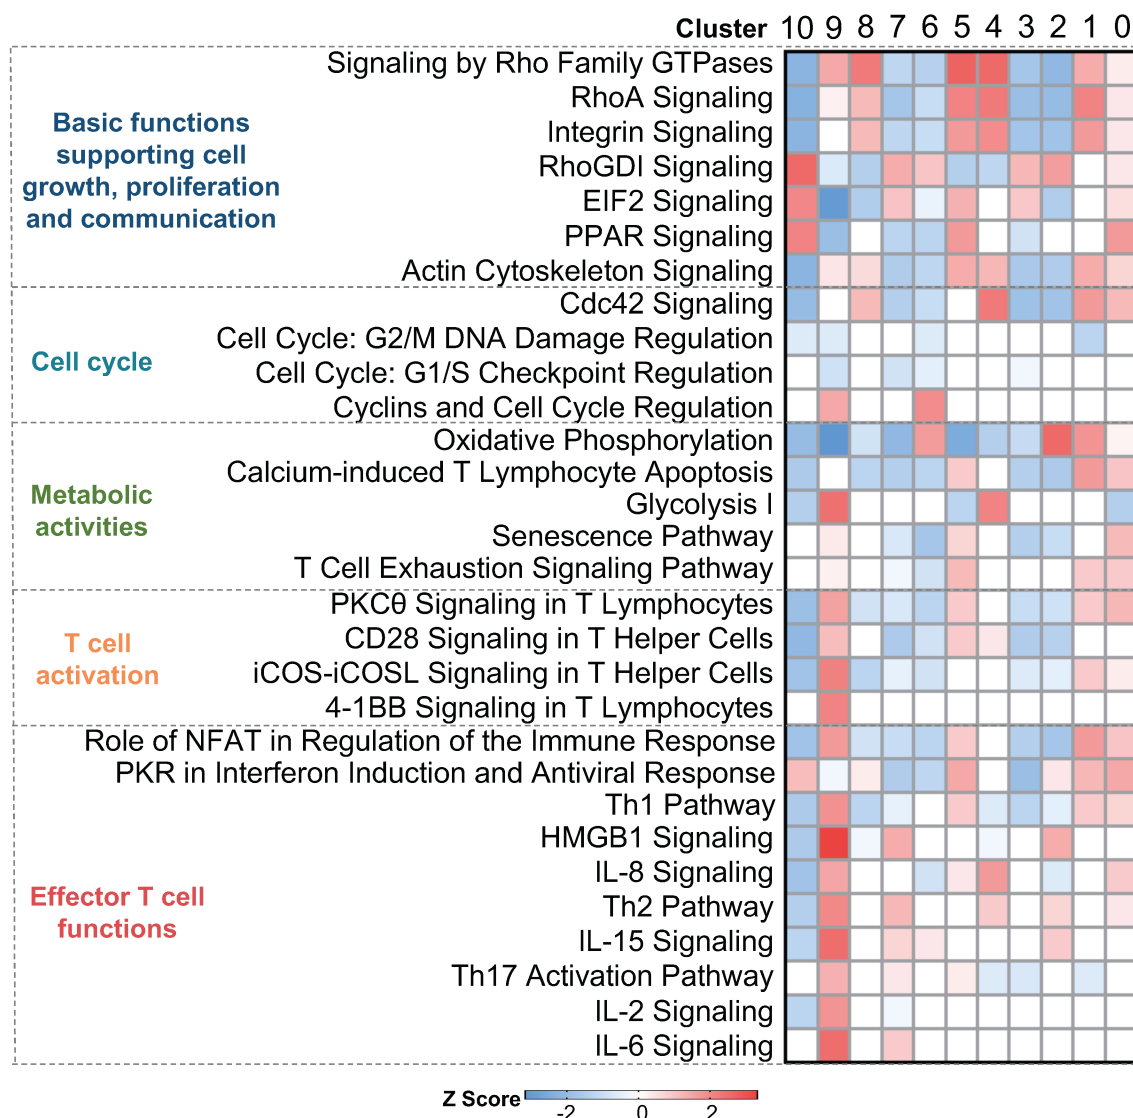

**Supplementary Figure 3. Canonical signaling pathways of each cluster identified in the global clustering analysis of all the CAR T cells profiled in our project.** Differentially expressed genes of each cluster are used to identify the biological pathways. A statistical quantity, called z score, is computed and used to characterize the activation level. z score reflects the predicted activation level ( $z < 0$ , inhibited;  $z > 0$ , activated;  $z \geq 2$  or  $z \leq -2$  can be considered significant).

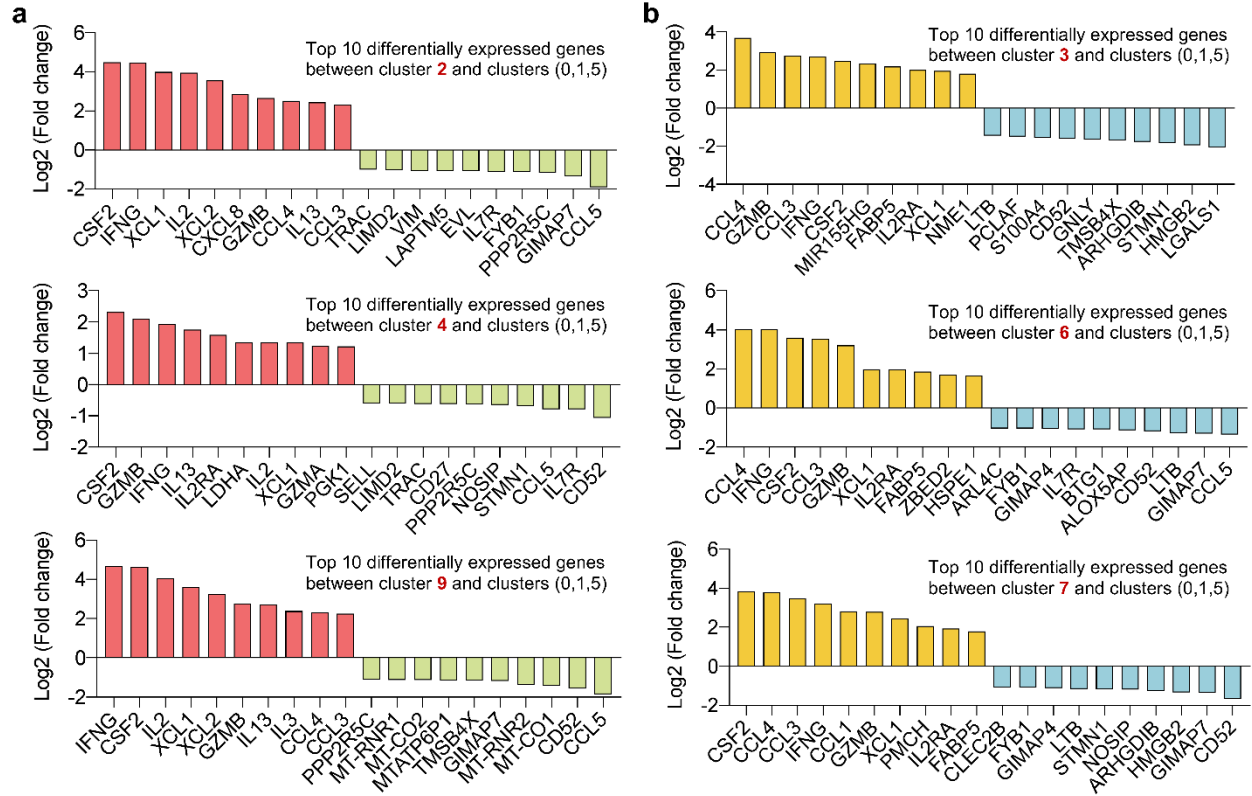

**Supplementary Figure 4. Differentially expressed gene analysis of stimulation condition-related clusters.** (a) Top 10 differentially expressed genes between clusters enriched in CD19-3T3 stimulated CAR T cells vs. MSLN-3T3 stimulated cells (b) Top 10 differentially expressed genes between clusters enriched in anti-CD3/CD28 beads stimulated CAR T cells vs. unstimulated cells.

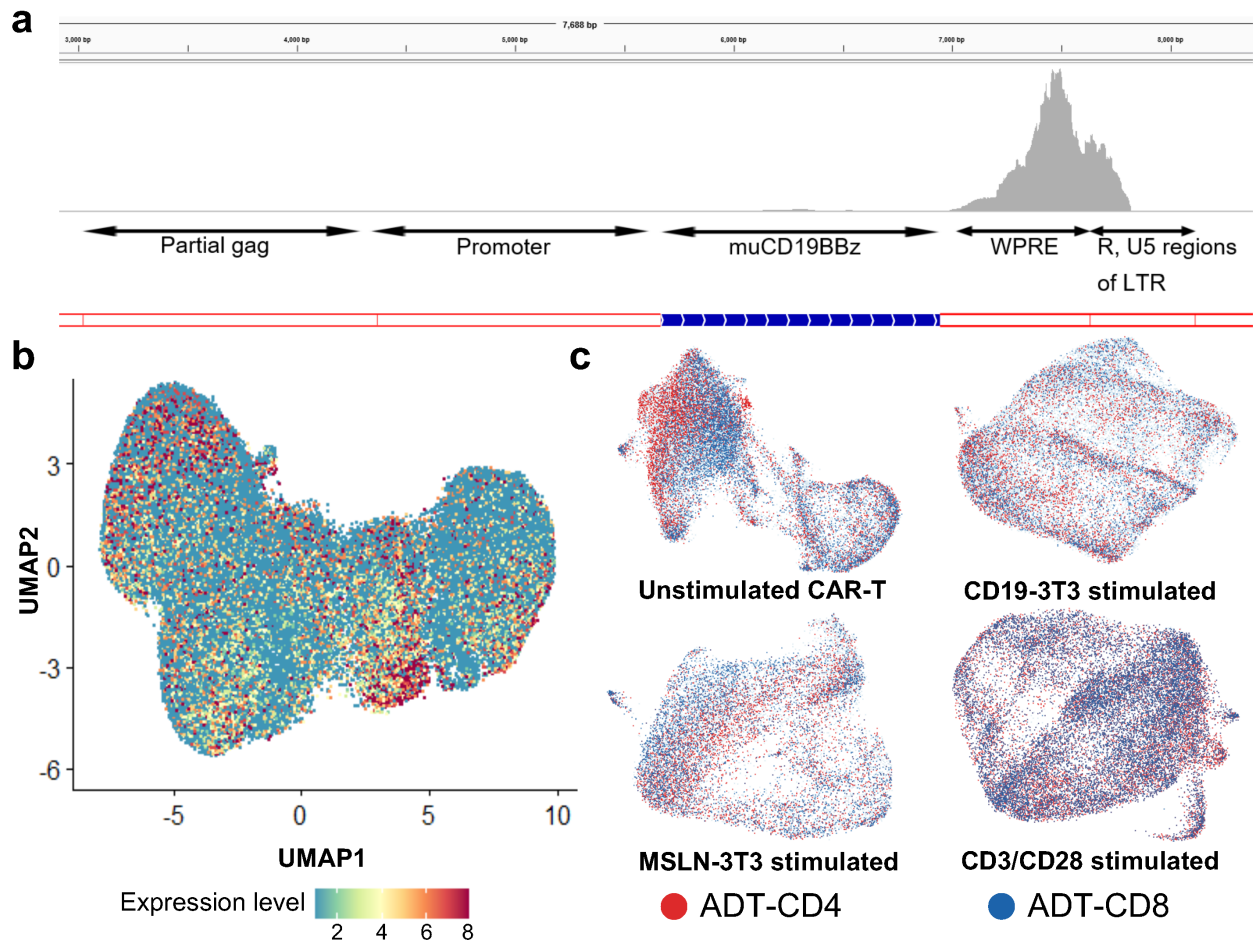

**Supplementary Figure 5. Detection of CAR structure, CAR gene expression and CD4/CD8 cellular molecule expression.** (a) Identify the expression of the lentiviral vector elements in the CAR construct. (b) The distribution of CAR gene expression among all profiled single cells. (c) ADT-CD4 and ADT-CD8 expression determined by CITE-seq data in four stimulation conditions.

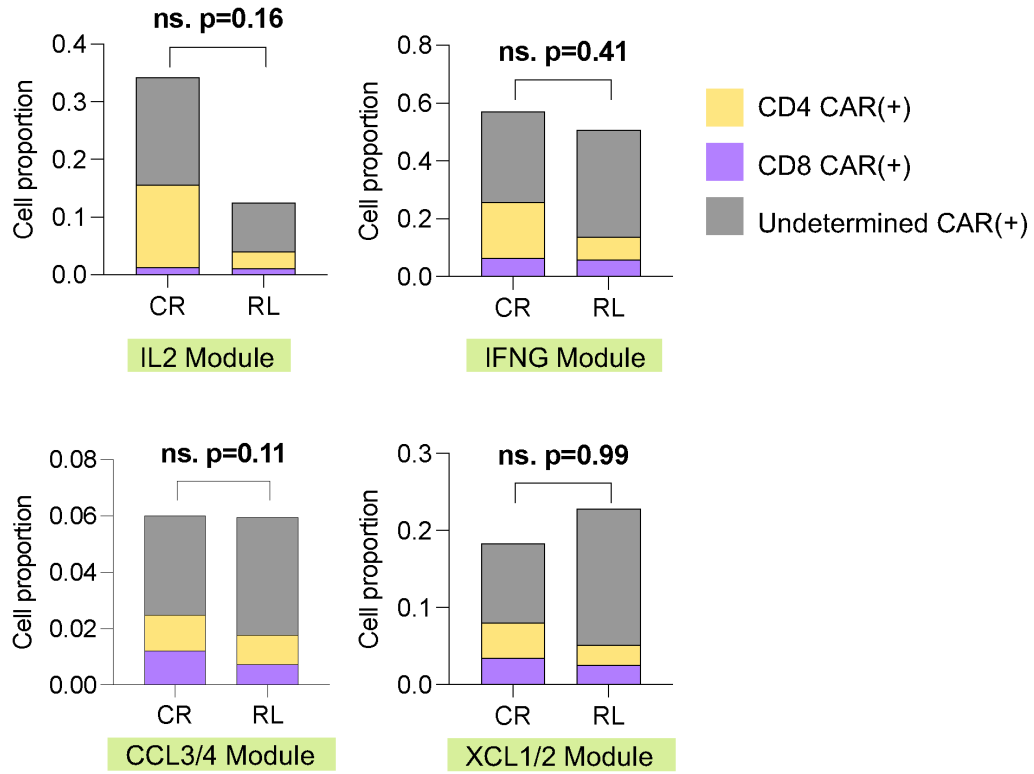

**Supplementary Figure 6. Comparison of identified modules (except for Th2 module) between CR and RL patients.** The *P* values were calculated with Mann-Whitney test. ns. Not significant.

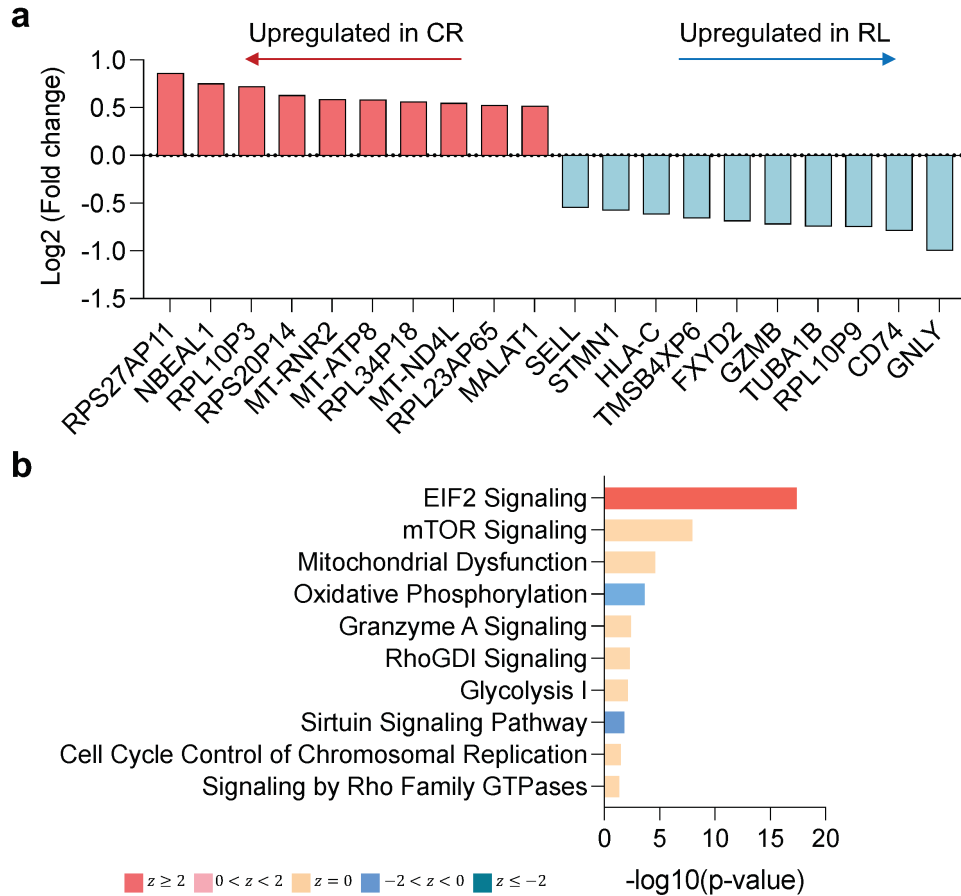

**Supplementary Figure 7. Differentially expressed genes between unstimulated baseline CAR T cells from CR and RL patients and the corresponding pathways. (a)** Top 10 DEGs upregulated in CR or RL group. **(b)** Corresponding canonical pathways regulated by the highly differential genes identified in (a).  $z$  score reflects the predicted activation level ( $z < 0$ , inhibited;  $z > 0$ , activated;  $z \geq 2$  or  $z \leq -2$  can be considered significant).

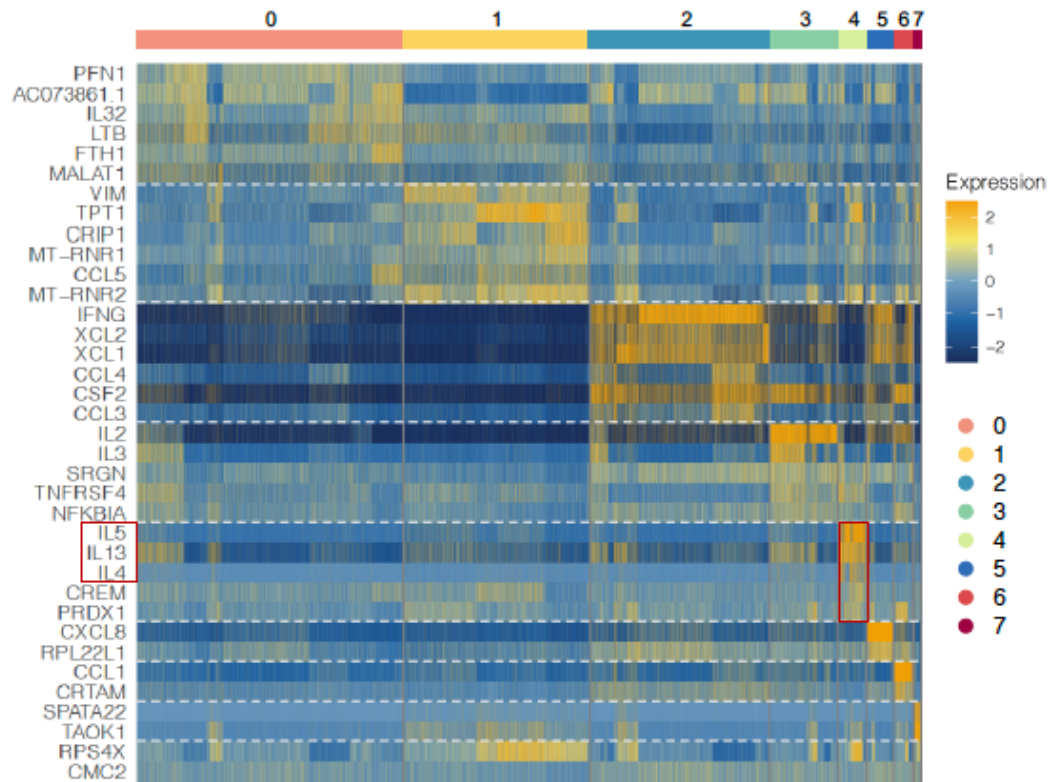

**Supplementary Figure 8. Differentially expressed genes of each cluster identified in isolated CAR<sup>+</sup> cells from CR and RL patients.** Heatmap of top 6 DEGs of each cluster was shown, among which the highly expression of Th2-related genes *IL13*, *IL5* and *IL4* in cluster 4 was indicated.

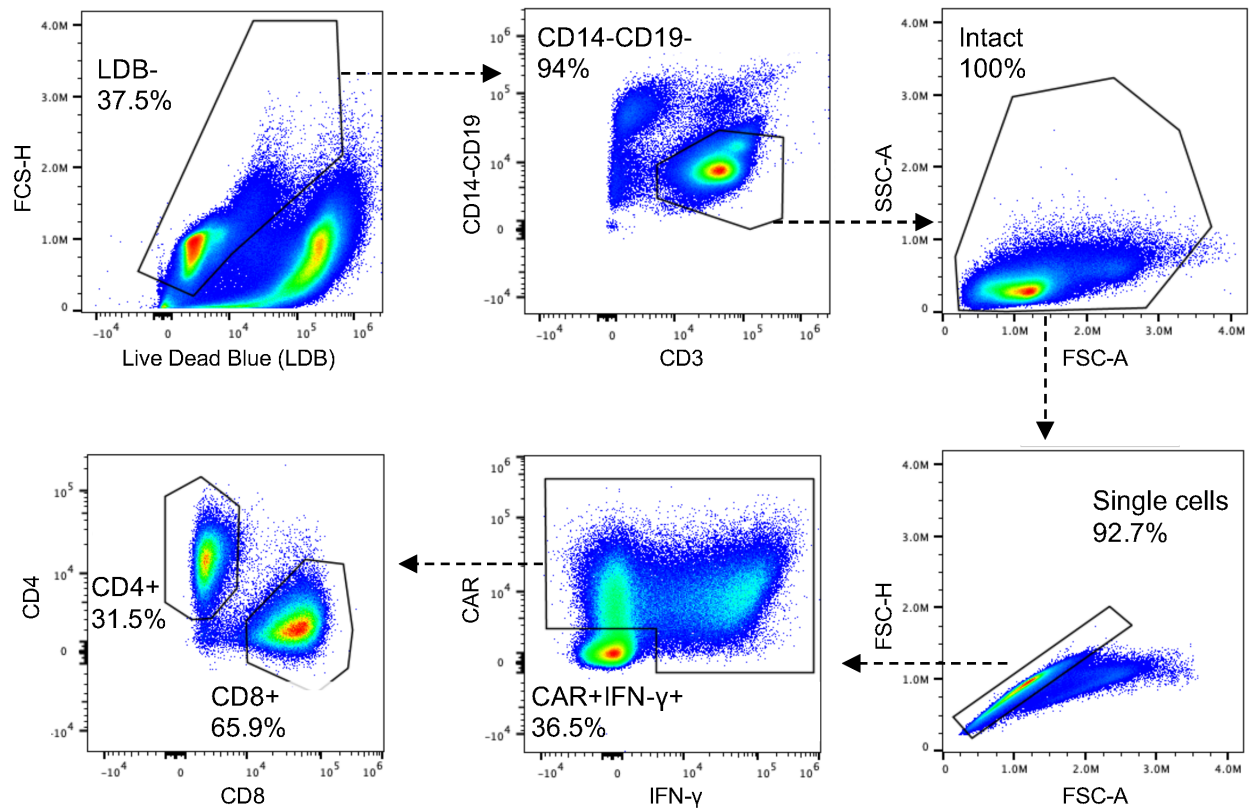

**Supplementary Figure 9. Gating strategy of flow cytometry data analysis.** The Live Dead Blue (LDB) was used to select live cells, followed by CD14-CD19-/CD3+ subset, intact and single cell selection. CAR+IFN-γ+ were applied to select fully activated CAR+ CAR T cells, and CD4+ or CD8+ subpopulation was analyzed separately.

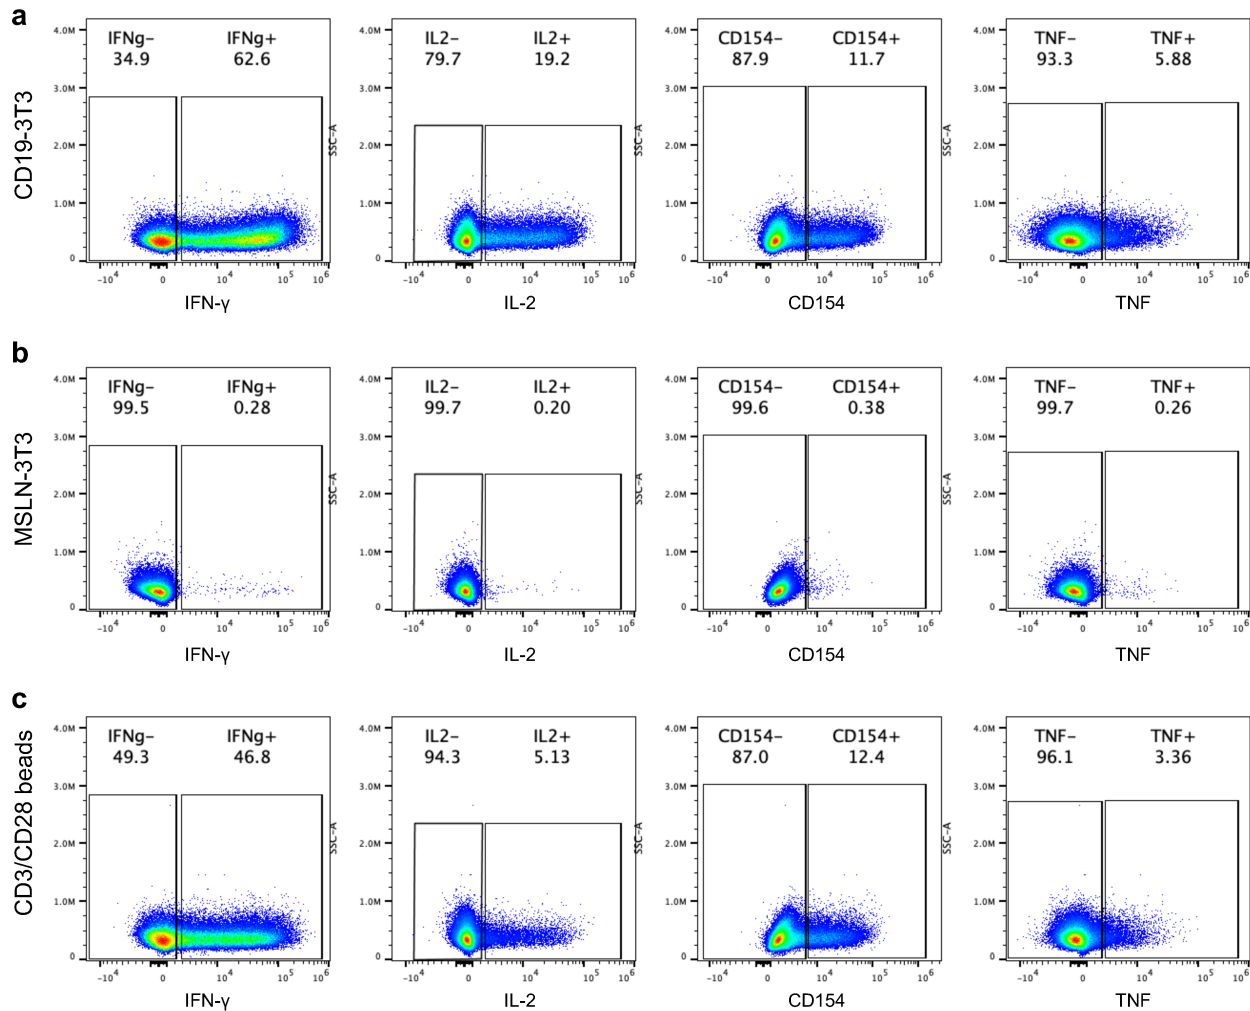

**Supplementary Figure 10. Representative flow plot showing activation-related signature's frequency in different coculture conditions. (a)** CAR T cells cocultured with CD19-3T3 cells produce high level of IFN- $\gamma$ , IL-2, CD154 and TNF. **(b)** CAR T cells cocultured with MSLN-3T3 have rare IFN- $\gamma$ , IL-2, CD154 and TNF production. **(c)** Stimulation with CD3/CD28 beads induces comparable IFN- $\gamma$ , IL-2, CD154 and TNF expression as compared with CD19-3T3 coculture.

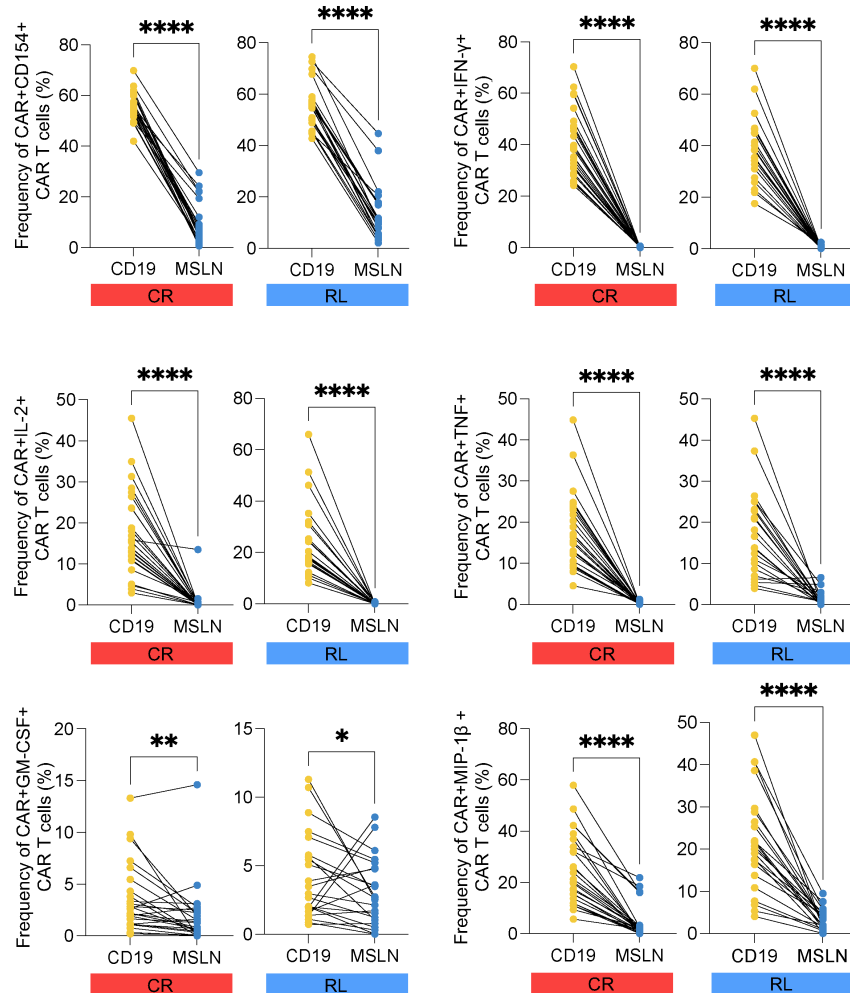

**Supplementary Figure 11. Frequency comparison of CD154+, IFN-γ+, IL-2+, TNF+, GM-CSF+ and MIP-1β+ CAR T cells between CD19-3T3 and MSLN-3T3 coculture conditions.** Results of CR and RL patients are presented separately. Each dot represents the frequency of each patient in specific response group. All the *P* values were calculated with Mann-Whitney test. \* *P* < 0.05, \*\* *P* < 0.01, \*\*\*\* *P* < 0.0001.

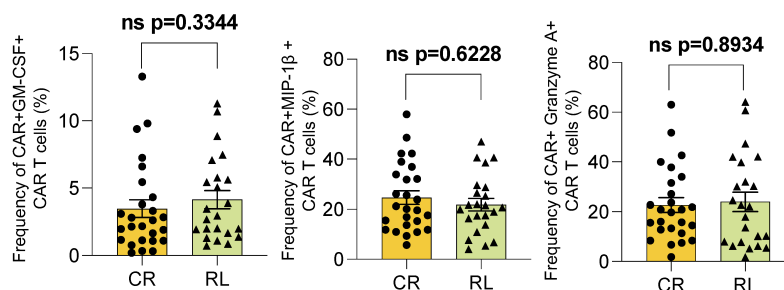

**Supplementary Figure 12. Frequency comparison of GM-CSF+, CCL4+, and Granzyme A+ CAR T cells between CR and RL response groups.** Results CAR T cells are cocultured with CD19-3T3 cells. All the *P* values were calculated with Mann-Whitney test. ns. Not significant. Scatter plots show mean ± s.e.m.

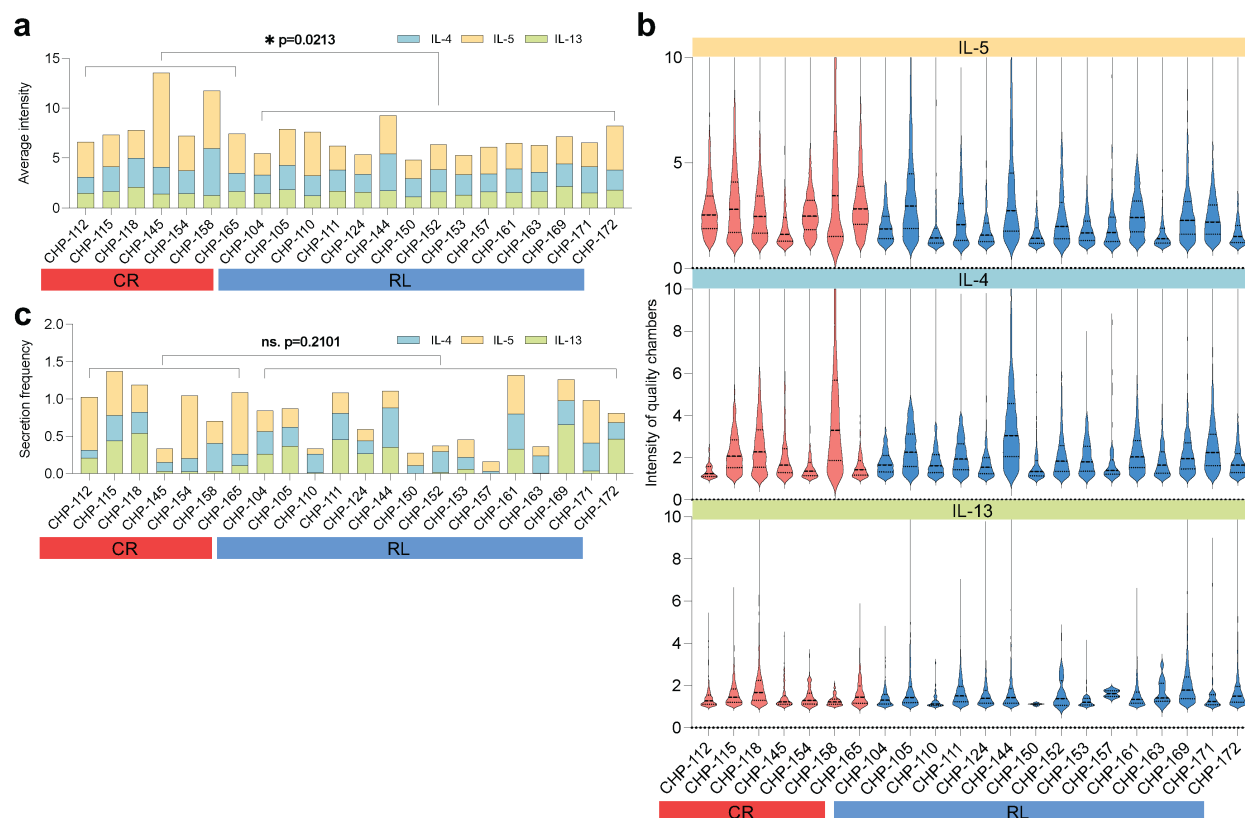

**Supplementary Figure 13. Comparison of the average intensity and secretion frequency of Th2 cytokines between CR and RL patients.** (a) The average signal intensity of quality chambers. (b) The intensity distribution of all the quality chambers. (c) The secretion frequency of Th2 cytokines. The *P* value was calculated with Mann-Whitney test. ns. Not significant.

|        | 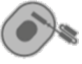 | 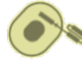 | 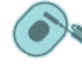 | 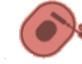 | 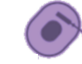 |
|--------|-------------------------------------------------------------------------------------|-------------------------------------------------------------------------------------|-------------------------------------------------------------------------------------|-------------------------------------------------------------------------------------|---------------------------------------------------------------------------------------|
|        | T <sub>N</sub>                                                                      | T <sub>SCM</sub>                                                                    | T <sub>CM</sub>                                                                     | T <sub>EM</sub>                                                                     | T <sub>EF</sub>                                                                       |
| CD62L  | +                                                                                   | +                                                                                   | +                                                                                   | —                                                                                   | —                                                                                     |
| CCR7   | +                                                                                   | +                                                                                   | +                                                                                   | —                                                                                   | —                                                                                     |
| CD45RA | +                                                                                   | +                                                                                   | —                                                                                   | —                                                                                   | +                                                                                     |
| CD45RO | —                                                                                   | +                                                                                   | +                                                                                   | +                                                                                   | —                                                                                     |

**Supplementary Figure 14. A four-marker scheme to determine T cell differentiation states.** T<sub>N</sub>, naïve; T<sub>SCM</sub>, stem cell-like memory; T<sub>CM</sub>, central memory; T<sub>EM</sub>, effector memory; T<sub>EF</sub>, effector T cells.

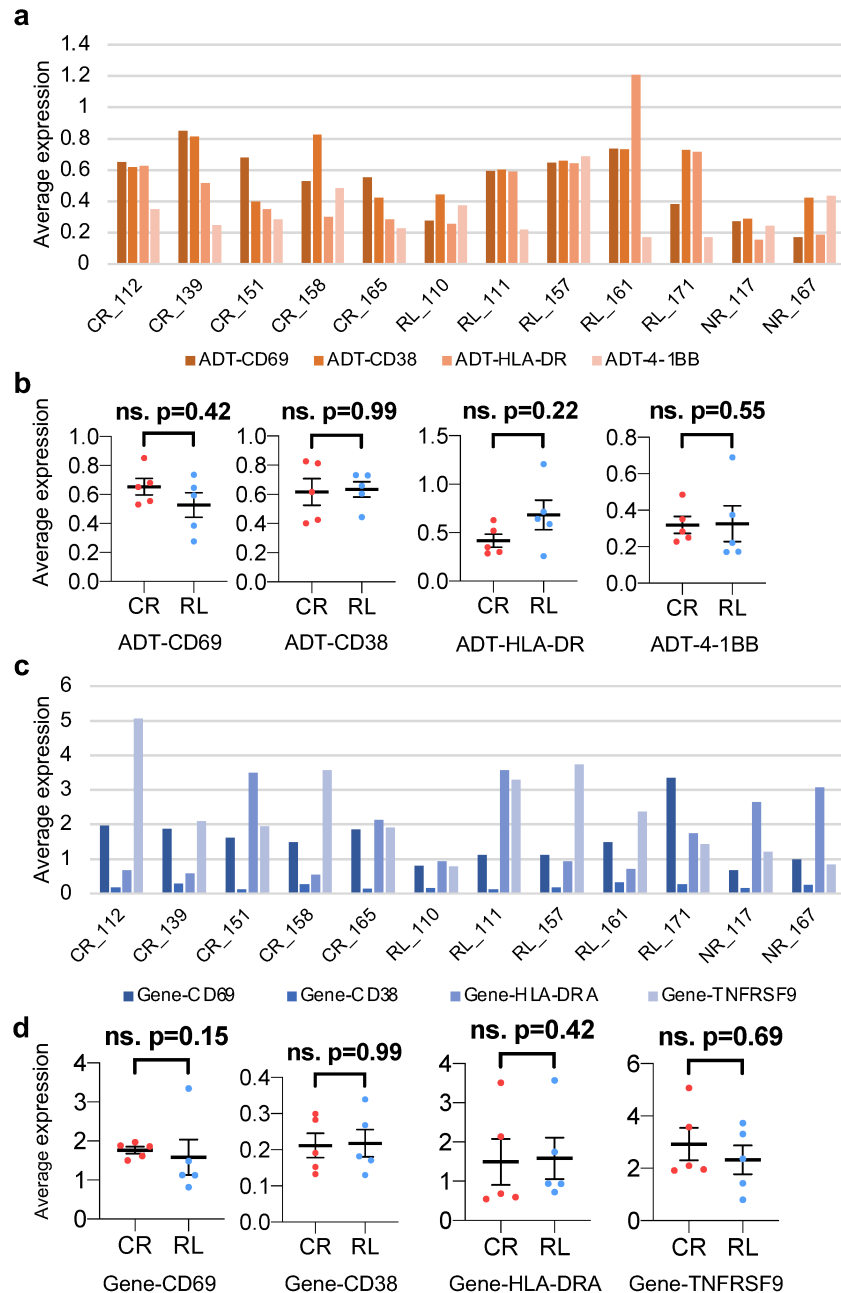

**Supplementary Figure 15. Expression of activation-related surface protein ADTs and encoding genes in CD19 stimulated CAR T cells and their comparison between response groups.** (a) The expression level of ADT-CD69, ADT-CD38, ADT-HLA-DR, ADT-4-1BB in each patient. (b) Comparison of the four protein markers expression between CR and RL patients. (c) The expression level of genes *CD69*, *CD38*, *HLA-DRA*, *TNFRSF9* in each patient. (d) Comparison of the four encoding genes expression between CR and RL patients. Each scatter point represents the average expression value of all single cells of specific patient. The *P* values were calculated with Mann-Whitney test. ns. Not significant. Scatter plots show mean $\pm$ s.e.m.

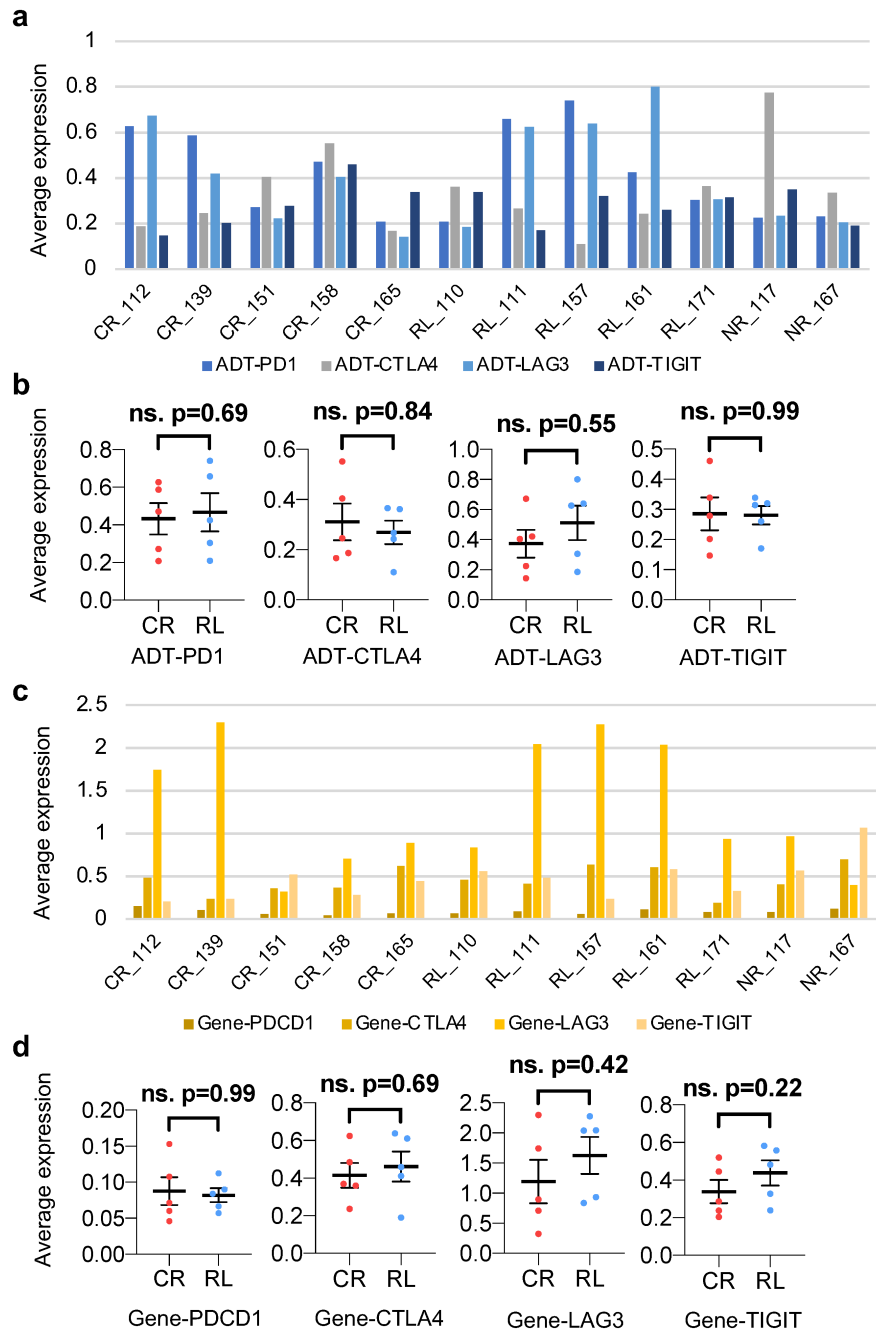

**Supplementary Figure 16. Expression of co-inhibitory surface protein ADTs and encoding genes in CD19 stimulated CAR T cells and their comparison between response groups.** (a) The expression level of ADT-PD1, ADT-CTLA4, ADT-LAG3, ADT-TIGIT in each patient. (b) Comparison of co-inhibitory protein markers expression between CR and RL patients. (c) The expression level of genes *PDCD1*, *CTLA4*, *LAG3*, *TIGIT* in each patient. (d) Comparison of co-inhibitory genes expression between CR and RL patients. Each scatter point represents the average expression value of all single cells of specific patient. The *P* values were calculated with Mann-Whitney test. ns. Not significant. Scatter plots show mean $\pm$ s.e.m.

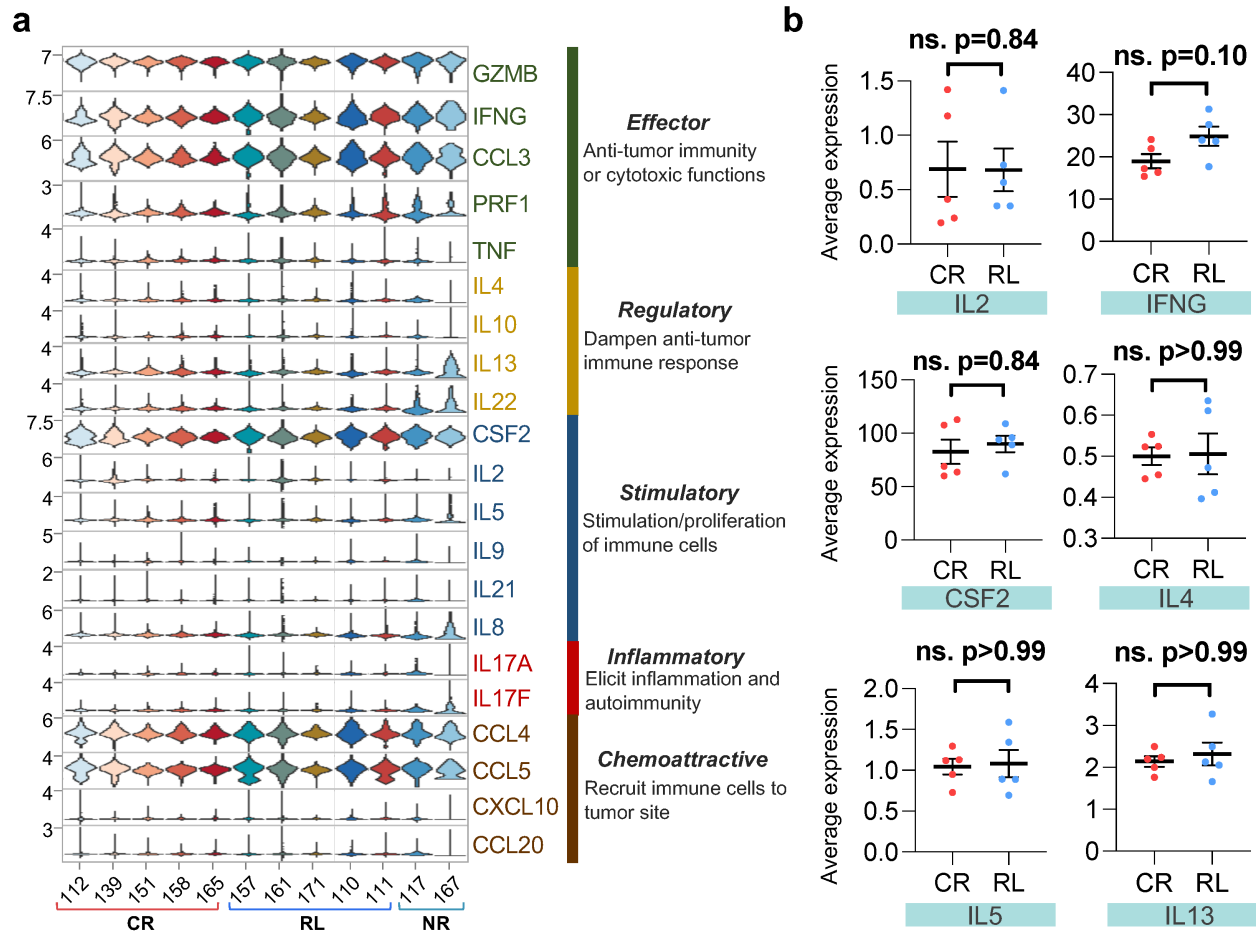

**Supplementary Figure 17. Cytokine gene expression pattern of TCR-stimulated CAR-T cells.** (a) Single cell expression level violin plot of all key immunologically relevant cytokine genes from CAR+ cells. (b) Quantification of expression level of selected cytokine genes and comparisons between CR and RL group. Each scatter point represents the average expression value of all single cells of specific patient. The *P* values were calculated with Mann-Whitney test. ns. Not significant. Scatter plots show mean±s.e.m.

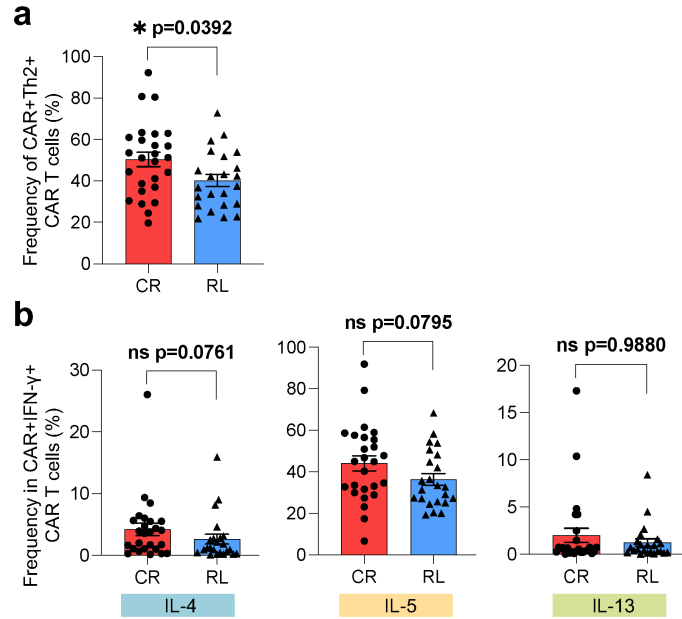

**Supplementary Figure 18. Frequency Th2+ CAR T cells in CD3/CD28 beads stimulation condition.** (a) The comparison of CAR+Th2+ CAR T cell frequency between CR and RL patients. Th2 measures the total frequency of IL-4+, IL-5+, and IL-13+ cells. (b) The frequency comparison of each Th2-related cytokine+ CAR T cells between CR and RL patients. All the  $P$  values were calculated with Mann-Whitney test. ns. Not significant. Scatter plots show mean $\pm$ s.e.m.

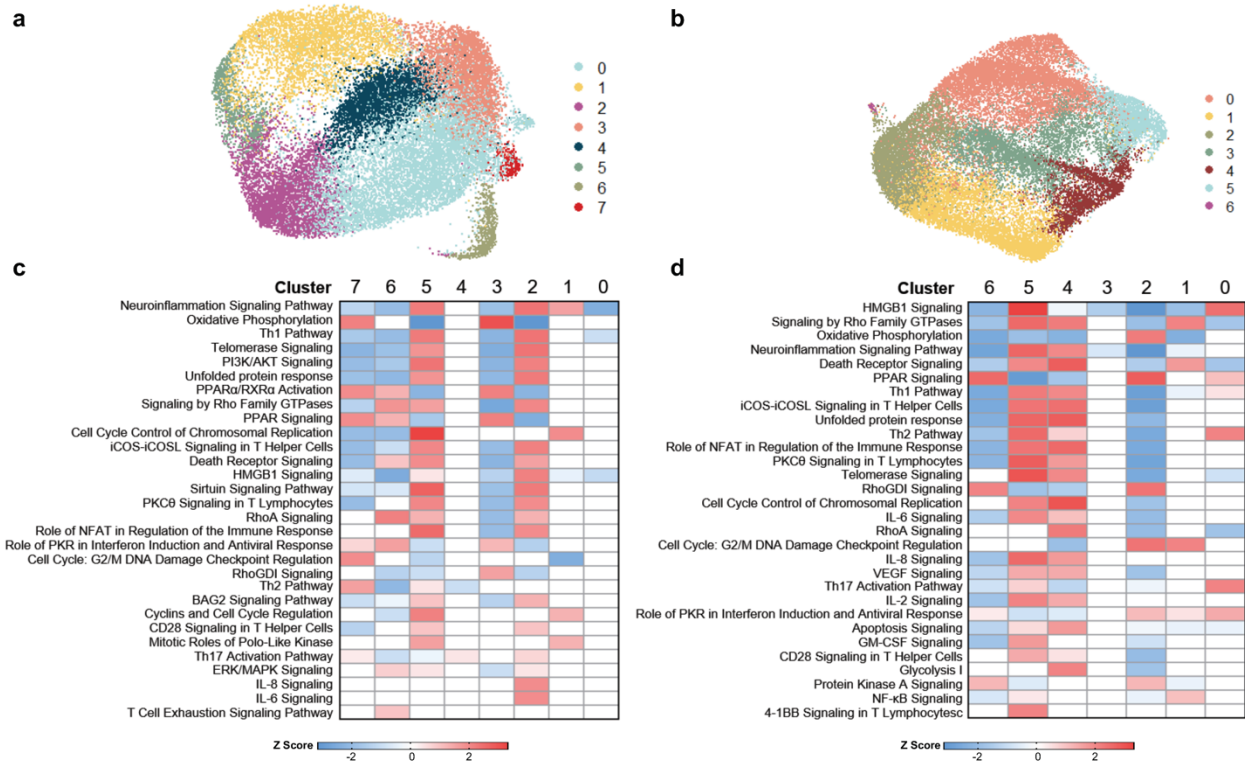

**Supplementary Figure 19. Global pathway analysis and comparison of CD19-specific or anti-CD3/CD28-beads stimulated pre-infusion CAR T cells. (a)** UMAP clustering of anti-CD3/CD28 beads stimulated cells. **(b)** UMAP clustering of CD19-3T3 stimulated cells. **(c)** Canonical pathway analysis and comparison of clusters in **(a)**. **(d)** Canonical pathway analysis and comparison of clusters in **(b)**. Differentially expressed genes of each cluster are used to identify the biological pathways.  $z$  score reflects the predicted activation level ( $z < 0$ , inhibited;  $z > 0$ , activated;  $z \geq 2$  or  $z \leq -2$  can be considered significant).
